# Supplementary material
Source: Springer Nature journal article supplement (https://www.springermedizin.de/resource/supplementary/13058_2007_1946_MOESM6_ESM.pdf/9700280)

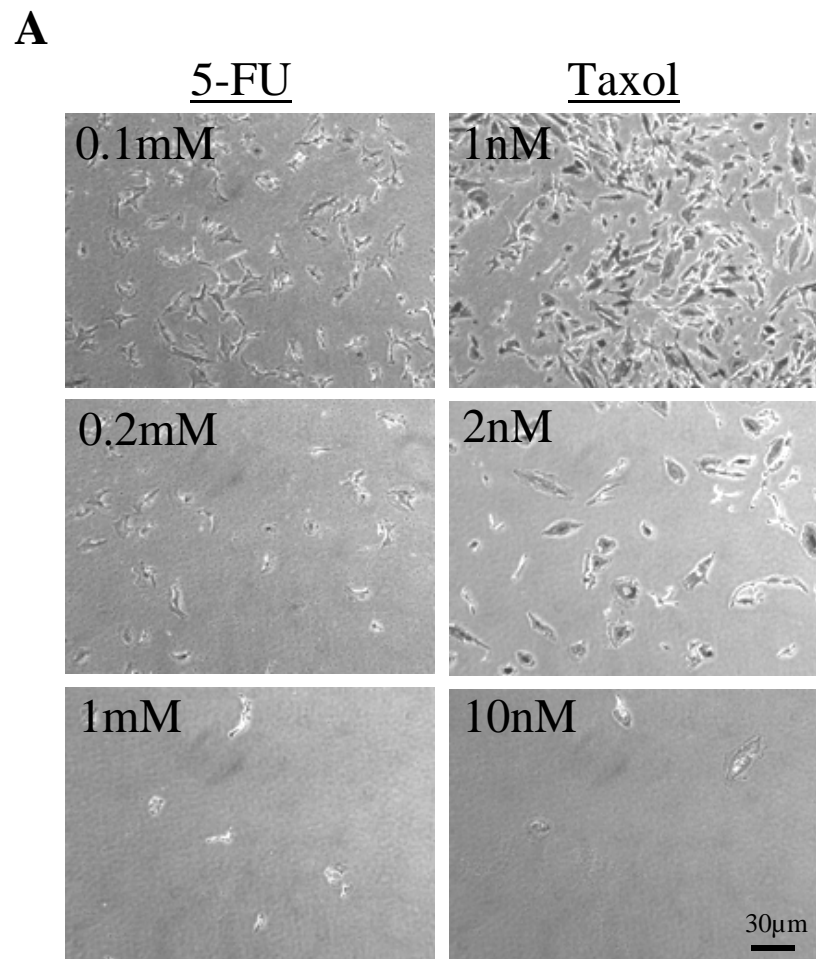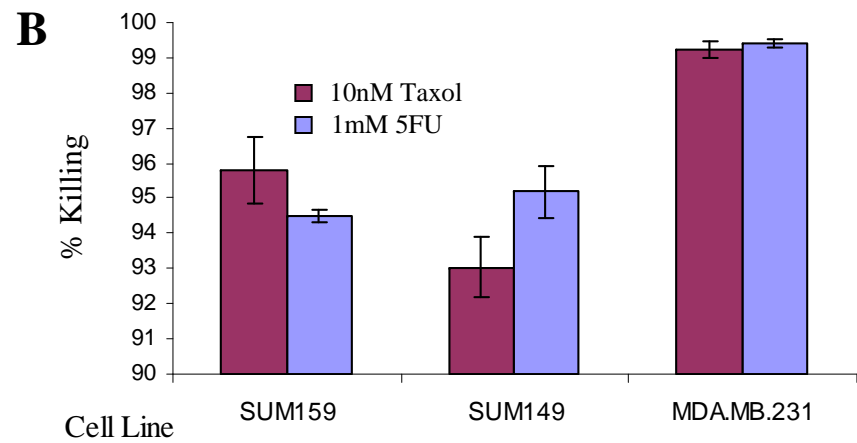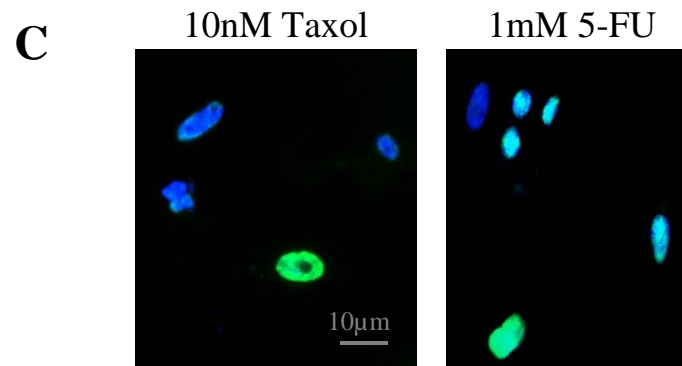

Supplement: MOESM6 [file 9700280]
